# Supplementary material for: Four-year clinical update and treatment switching-adjusted outcomes with first-line nivolumab plus ipilimumab with chemotherapy for metastatic non-small cell lung cancer in the CheckMate 9LA randomized trial
Source: PubMed Central journal article supplement — J Immunother Cancer. 2024 Feb 12;12(2):e008189. doi: 10.1136/jitc-2023-008189 (PMC10862253; doi:10.1136/jitc-2023-008189), 2024-02-12
Supplement: jitc-2023-008189supp002.pdf [file jitc-2023-008189supp002.pdf]

### Four-year clinical update and treatment switching-adjusted outcomes with first-line nivolumab plus ipilimumab with chemotherapy for metastatic non-small cell lung cancer in the CheckMate 9LA randomized trial

Nivolumab plus ipilimumab with chemotherapy provides long-term OS benefit over chemotherapy alone in all randomized patients with metastatic NSCLC

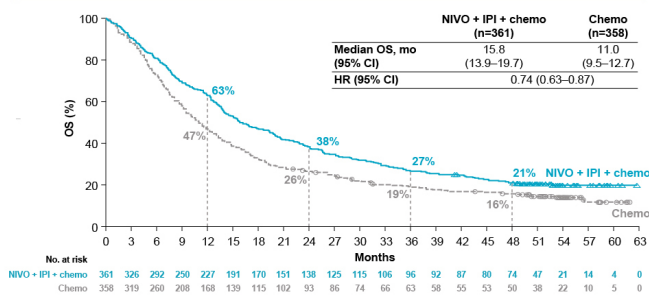

Nivolumab plus ipilimumab with chemotherapy provides long-term OS benefit over chemotherapy alone regardless of tumor PD-L1 expression (<1% or ≥1%) or histology (squamous or nonsquamous)

|                         | PD-L1 <1%                  |                | PD-L1 ≥1%                  |                 | Squamous                   |                | Nonsquamous                |                 |
|-------------------------|----------------------------|----------------|----------------------------|-----------------|----------------------------|----------------|----------------------------|-----------------|
|                         | NIVO + IPI + chemo (n=135) | Chemo (n=129)  | NIVO + IPI + chemo (n=204) | Chemo (n=204)   | NIVO + IPI + chemo (n=115) | Chemo (n=112)  | NIVO + IPI + chemo (n=246) | Chemo (n=246)   |
| Median OS, mo (95% CI)  | 17.7 (13.7-20.3)           | 9.8 (7.7-13.5) | 15.8 (13.8-22.2)           | 10.9 (9.5-13.2) | 14.5 (13.1-19.3)           | 9.1 (7.2-11.6) | 17.8 (14.1-20.7)           | 12.0 (9.9-13.9) |
| HR (95% CI)             | 0.66 (0.50-0.86)           |                | 0.74 (0.60-0.92)           |                 | 0.64 (0.48-0.84)           |                | 0.80 (0.66-0.97)           |                 |
| 4-y OS rate, % (95% CI) | 23 (16-30)                 | 13 (8-20)      | 21 (16-27)                 | 16 (11-22)      | 20 (13-28)                 | 10 (5-16)      | 22 (17-27)                 | 19 (14-24)      |

- In an exploratory efficacy analysis of patients who discontinued all components of nivolumab plus ipilimumab with chemotherapy due to treatment-related adverse events, the 4-year OS rate was 41%
- Safety was consistent with prior reports, and no new safety signals were observed

Overall, nivolumab plus ipilimumab with chemotherapy continued to demonstrate long-term, durable efficacy benefit versus chemotherapy alone as a first-line therapy in patients with metastatic or recurrent NSCLC regardless of tumor PD-L1 expression or histology and further support its use as an efficacious first-line treatment option particularly for patients with tumor PD-L1 <1% or squamous histology, populations with high unmet needs

David P. Carbone, Tudor-Eliade Ciuleanu, Michael Schenker, Manuel Cobo, Stephanie Bordenave, Oscar Juan-Vidal, Juliana Mezes, Niels Reinmuth, Eduardo Richardet, Ying Cheng, Hideaki Mizutani, Enriqueta Felip, Bogdan Zurawski, Aurelia Alexandru, Luis Paz-Ares, Shun Lu, Thomas John, Xiaoqing Zhang, Javed Mahmood, Nan Hu, Tuli De, Irene Santi, John R. Penrod, Yong Yuan, Adam Lee, Martin Reck
